# Supplementary material for: Associations between gestational weight gain adequacy and neonatal outcomes in Tanzania
Source: bioRxiv or medRxiv preprint supplement (doi:10.1101/2021.08.19.21262273), 2021-08-25
Supplement: Supplementary file [file media-1.pdf]

**Supplemental Table 1:** Associations between percent adequacy of total gestational weight gain and perinatal outcomes, modified by maternal pre-pregnancy BMI<sup>1</sup>.

| Characteristic                                 | n     | Severely Inadequate (<70%) |                           | Inadequate (70% to <90%) |                           | Adequate (90% to 125%) |  | Excessive (>125%)  |                           |
|------------------------------------------------|-------|----------------------------|---------------------------|--------------------------|---------------------------|------------------------|--|--------------------|---------------------------|
|                                                |       | RR (95% CI)                | <i>P int</i> <sup>2</sup> | RR (95% CI)              | <i>P int</i> <sup>2</sup> | RR (95% CI)            |  | RR (95% CI)        | <i>P int</i> <sup>2</sup> |
| <b>Stillbirth</b>                              | 6,579 |                            |                           |                          |                           |                        |  |                    |                           |
| Underweight (BMI <18.5 kg/m <sup>2</sup> )     |       | 0.79 (0.33, 1.88)          | 0.52                      | 0.48 (0.15, 1.59)        | 0.95                      | 1.0                    |  | 3.13 (0.96, 10.20) | <b>0.04</b>               |
| Normal weight (18.5 – 24.9 kg/m <sup>2</sup> ) |       | 1.17 (0.74, 1.87)          | Ref.                      | 1.01 (0.63, 1.63)        | Ref.                      | 1.0                    |  | 1.73 (0.95, 3.15)  | Ref.                      |
| Overweight/Obese (≥ 25 kg/m <sup>2</sup> )     |       | 1.49 (0.71, 3.13)          | 0.81                      | 1.66 (0.69, 4.00)        | 0.99                      | 1.0                    |  | 1.17 (0.64, 2.12)  | 0.40                      |
| <b>Perinatal death</b>                         | 6,376 |                            |                           |                          |                           |                        |  |                    |                           |
| Underweight (BMI <18.5 kg/m <sup>2</sup> )     |       | 0.91 (0.47, 1.78)          | 0.64                      | 1.23 (0.63, 2.40)        | 0.31                      | 1.0                    |  | 2.45 (0.76, 7.93)  | 0.09                      |
| Normal weight (18.5 – 24.9 kg/m <sup>2</sup> ) |       | 0.98 (0.68, 1.40)          | Ref.                      | 0.76 (0.52, 1.12)        | Ref.                      | 1.0                    |  | 1.06 (0.63, 1.80)  | Ref.                      |
| Overweight/Obese (≥ 25 kg/m <sup>2</sup> )     |       | 1.87 (1.06, 3.30)          | 0.55                      | 2.02 (0.99, 4.09)        | 0.49                      | 1.0                    |  | 1.84 (1.09, 3.12)  | 0.56                      |
| <b>Preterm-born</b>                            | 6,370 |                            |                           |                          |                           |                        |  |                    |                           |
| Underweight (BMI <18.5 kg/m <sup>2</sup> )     |       | 1.03 (0.71, 1.51)          | 0.53                      | 0.75 (0.49, 1.16)        | 0.72                      | 1.0                    |  | 1.21 (0.46, 3.18)  | 0.52                      |
| Normal weight (18.5 – 24.9 kg/m <sup>2</sup> ) |       | 1.06 (0.85, 1.32)          | Ref.                      | 1.00 (0.80, 1.24)        | Ref.                      | 1.0                    |  | 1.30 (0.94, 1.81)  | Ref.                      |
| Overweight/Obese (≥ 25 kg/m <sup>2</sup> )     |       | 0.90 (0.59, 1.37)          | 0.40                      | 0.90 (0.54, 1.49)        | 0.45                      | 1.0                    |  | 0.66 (0.45, 0.94)  | 0.78                      |
| <b>Low birthweight</b>                         | 6,205 |                            |                           |                          |                           |                        |  |                    |                           |
| Underweight (BMI <18.5 kg/m <sup>2</sup> )     |       | 2.95 (1.95, 4.48)          | <b>0.03</b>               | 1.65 (0.97, 2.78)        | 0.46                      | 1.0                    |  | 1.49 (0.42, 5.33)  | 0.76                      |
| Normal weight (18.5 – 24.9 kg/m <sup>2</sup> ) |       | 1.34 (0.97, 1.87)          | Ref.                      | 1.08 (0.77, 1.52)        | Ref.                      | 1.0                    |  | 1.41 (0.87, 2.30)  | Ref.                      |
| Overweight/Obese (≥ 25 kg/m <sup>2</sup> )     |       | 0.94 (0.49, 1.78)          | 0.45                      | 1.13 (0.54, 2.35)        | 0.28                      | 1.0                    |  | 0.58 (0.33, 1.02)  | 0.77                      |
| <b>Small-for-gestational age</b>               | 6,188 |                            |                           |                          |                           |                        |  |                    |                           |
| Underweight (BMI <18.5 kg/m <sup>2</sup> )     |       | 1.44 (1.07, 1.95)          | 0.23                      | 1.21 (0.87, 1.67)        | 0.59                      | 1.0                    |  | 1.83 (0.72, 4.64)  | 0.28                      |
| Normal weight (18.5 – 24.9 kg/m <sup>2</sup> ) |       | 1.79 (1.47, 2.18)          | Ref.                      | 1.49 (1.22, 1.81)        | Ref.                      | 1.0                    |  | 0.79 (0.56, 1.12)  | Ref.                      |
| Overweight/Obese (≥ 25 kg/m <sup>2</sup> )     |       | 0.75 (0.51, 1.11)          | 0.40                      | 0.82 (0.52, 1.28)        | 0.63                      | 1.0                    |  | 0.93 (0.63, 1.36)  | 0.97                      |
| <b>Large-for-gestational age</b>               | 6,188 |                            |                           |                          |                           |                        |  |                    |                           |
| Underweight (BMI <18.5 kg/m <sup>2</sup> )     |       | 0.41 (0.21, 0.77)          | 0.82                      | 0.72 (0.43, 1.19)        | 0.27                      | 1.0                    |  | 0.99 (0.36, 2.71)  | 0.20                      |
| Normal weight (18.5 – 24.9 kg/m <sup>2</sup> ) |       | 0.65 (0.51, 0.83)          | Ref.                      | 0.72 (0.57, 0.91)        | Ref.                      | 1.0                    |  | 1.32 (0.95, 1.84)  | Ref.                      |
| Overweight/Obese (≥ 25 kg/m <sup>2</sup> )     |       | 1.20 (0.76, 1.88)          | 0.08                      | 0.69 (0.37, 1.27)        | 0.91                      | 1.0                    |  | 0.87 (0.61, 1.25)  | 0.44                      |
| <b>Stunting at birth</b>                       | 4,590 |                            |                           |                          |                           |                        |  |                    |                           |
| Underweight (BMI <18.5 kg/m <sup>2</sup> )     |       | 1.12 (0.79, 1.60)          | 0.91                      | 0.77 (0.52, 1.14)        | 0.16                      | 1.0                    |  | 0.60 (0.19, 1.89)  | 0.29                      |
| Normal weight (18.5 – 24.9 kg/m <sup>2</sup> ) |       | 1.26 (1.02, 1.55)          | Ref.                      | 1.23 (1.00, 1.51)        | Ref.                      | 1.0                    |  | 1.03 (0.75, 1.42)  | Ref.                      |
| Overweight/Obese (≥ 25 kg/m <sup>2</sup> )     |       | 1.09 (0.73, 1.62)          | 0.96                      | 1.30 (0.85, 2.00)        | 0.46                      | 1.0                    |  | 1.03 (0.73, 1.44)  | 0.85                      |
| <b>Microcephaly</b>                            | 5,435 |                            |                           |                          |                           |                        |  |                    |                           |
| Underweight (BMI <18.5 kg/m <sup>2</sup> )     |       | 1.00 (0.60, 1.66)          | 0.38                      | 1.10 (0.67, 1.82)        | 0.54                      | 1.0                    |  | 1.81 (0.49, 6.61)  | 0.74                      |
| Normal weight (18.5 – 24.9 kg/m <sup>2</sup> ) |       | 1.48 (1.09, 2.01)          | Ref.                      | 1.37 (1.01, 1.86)        | Ref.                      | 1.0                    |  | 0.94 (0.56, 1.55)  | Ref.                      |
| Overweight/Obese (≥ 25 kg/m <sup>2</sup> )     |       | 0.90 (0.52, 1.58)          | 0.32                      | 1.34 (0.75, 2.41)        | 0.93                      | 1.0                    |  | 1.15 (0.67, 1.97)  | 0.73                      |
| <b>Macrosomia</b>                              | 6,205 |                            |                           |                          |                           |                        |  |                    |                           |
| Underweight (BMI <18.5 kg/m <sup>2</sup> )     |       | 0.52 (0.07, 4.20)          | 0.86                      | 0.52 (0.12, 2.19)        | 0.80                      | 1.0                    |  | 0.90 (0.11, 7.38)  | 0.80                      |
| Normal weight (18.5 – 24.9 kg/m <sup>2</sup> ) |       | 0.27 (0.13, 0.56)          | Ref.                      | 0.58 (0.34, 1.00)        | Ref.                      | 1.0                    |  | 1.47 (0.78, 2.77)  | Ref.                      |
| Overweight/Obese (≥ 25 kg/m <sup>2</sup> )     |       | 1.61 (0.44, 5.87)          | 0.60                      | 2.11 (0.84, 5.25)        | 0.24                      | 1.0                    |  | 1.29 (0.68, 2.45)  | 0.71                      |

<sup>1</sup> Multivariable models adjusted for maternal age, education, marital status, wealth quintile, smoking status, alcohol consumption, maternal pre-pregnancy BMI, and supplementation group assignment.

<sup>2</sup> P-value for interaction based on Wald test evaluating the relationship between gestational weight gain adequacy ratio and perinatal outcome among normal weight women is the reference.

**Supplemental Table 2:** Associations between percent adequacy of early gestational weight gain (2<sup>nd</sup> trimester) and perinatal outcomes, modified by maternal pre-pregnancy BMI<sup>1</sup>.

| Characteristic                                 | n     | Severely Inadequate (<70%) |                           | Inadequate (70% to <90%) |                           | Adequate (90% to 125%) |                           | Excessive (>125%) |                           |
|------------------------------------------------|-------|----------------------------|---------------------------|--------------------------|---------------------------|------------------------|---------------------------|-------------------|---------------------------|
|                                                |       | RR (95% CI)                | <i>P int</i> <sup>2</sup> | RR (95% CI)              | <i>P int</i> <sup>2</sup> | RR (95% CI)            | <i>P int</i> <sup>2</sup> | RR (95% CI)       | <i>P int</i> <sup>2</sup> |
| <b>Stillbirth</b>                              | 7,054 |                            |                           |                          |                           |                        |                           |                   |                           |
| Underweight (BMI <18.5 kg/m <sup>2</sup> )     |       | 0.97 (0.33, 2.83)          | 0.49                      | 0.71 (0.33, 1.51)        | 0.72                      | 1.0                    |                           | 1.90 (0.66, 5.44) | 0.12                      |
| Normal weight (18.5 – 24.9 kg/m <sup>2</sup> ) |       | 0.94 (0.58, 1.53)          | Ref.                      | 1.07 (0.72, 1.59)        | Ref.                      | 1.0                    |                           | 1.14 (0.64, 2.03) | Ref.                      |
| Overweight/Obese (≥ 25 kg/m <sup>2</sup> )     |       | 2.06 (1.00, 4.23)          | 0.63                      | 0.70 (0.17, 2.91)        | 0.31                      | 1.0                    |                           | 1.55 (0.88, 2.73) | 0.93                      |
| <b>Perinatal death</b>                         | 6,750 |                            |                           |                          |                           |                        |                           |                   |                           |
| Underweight (BMI <18.5 kg/m <sup>2</sup> )     |       | 1.36 (0.64, 2.90)          | 0.65                      | 0.84 (0.47, 1.50)        | 0.58                      | 1.0                    |                           | 1.26 (0.49, 3.23) | 0.79                      |
| Normal weight (18.5 – 24.9 kg/m <sup>2</sup> ) |       | 0.94 (0.64, 1.37)          | Ref.                      | 0.92 (0.67, 1.26)        | Ref.                      | 1.0                    |                           | 1.13 (0.72, 1.78) | Ref.                      |
| Overweight/Obese (≥ 25 kg/m <sup>2</sup> )     |       | 2.26 (1.30, 3.93)          | 0.38                      | 1.80 (0.83, 3.89)        | 0.80                      | 1.0                    |                           | 1.52 (0.97, 2.37) | 0.90                      |
| <b>Preterm-born</b>                            | 6,807 |                            |                           |                          |                           |                        |                           |                   |                           |
| Underweight (BMI <18.5 kg/m <sup>2</sup> )     |       | 1.11 (0.71, 1.72)          | 0.17                      | 0.77 (0.53, 1.11)        | 0.75                      | 1.0                    |                           | 1.12 (0.59, 2.12) | 0.24                      |
| Normal weight (18.5 – 24.9 kg/m <sup>2</sup> ) |       | 1.55 (1.25, 1.91)          | Ref.                      | 0.86 (0.71, 1.05)        | Ref.                      | 1.0                    |                           | 1.17 (0.89, 1.56) | Ref.                      |
| Overweight/Obese (≥ 25 kg/m <sup>2</sup> )     |       | 0.80 (0.54, 1.19)          | 0.47                      | <b>2.19 (1.32, 3.62)</b> | <b>0.02</b>               | 1.0                    |                           | 0.62 (0.45, 0.84) | 0.07                      |
| <b>Low birthweight</b>                         | 6,579 |                            |                           |                          |                           |                        |                           |                   |                           |
| Underweight (BMI <18.5 kg/m <sup>2</sup> )     |       | 3.26 (1.94, 5.45)          | 0.02                      | 1.61 (1.05, 2.45)        | 0.54                      | 1.0                    |                           | 1.63 (0.70, 3.81) | 0.64                      |
| Normal weight (18.5 – 24.9 kg/m <sup>2</sup> ) |       | 1.43 (1.03, 2.00)          | Ref.                      | 1.16 (0.87, 1.56)        | Ref.                      | 1.0                    |                           | 1.26 (0.81, 1.95) | Ref.                      |
| Overweight/Obese (≥ 25 kg/m <sup>2</sup> )     |       | 1.05 (0.58, 1.91)          | 0.94                      | 1.14 (0.48, 2.68)        | 0.94                      | 1.0                    |                           | 0.68 (0.42, 1.09) | 0.23                      |
| <b>Small-for-gestational age</b>               | 6,559 |                            |                           |                          |                           |                        |                           |                   |                           |
| Underweight (BMI <18.5 kg/m <sup>2</sup> )     |       | 1.31 (0.86, 2.00)          | 1.0                       | 1.34 (1.03, 1.76)        | 0.92                      | 1.0                    |                           | 1.34 (0.72, 2.50) | 0.96                      |
| Normal weight (18.5 – 24.9 kg/m <sup>2</sup> ) |       | 1.28 (1.04, 1.58)          | Ref.                      | 1.38 (1.15, 1.64)        | Ref.                      | 1.0                    |                           | 0.82 (0.61, 1.10) | Ref.                      |
| Overweight/Obese (≥ 25 kg/m <sup>2</sup> )     |       | 0.83 (0.55, 1.25)          | 0.96                      | 0.57 (0.30, 1.09)        | 0.32                      | 1.0                    |                           | 0.91 (0.66, 1.26) | 0.77                      |
| <b>Large-for-gestational age</b>               | 6,559 |                            |                           |                          |                           |                        |                           |                   |                           |
| Underweight (BMI <18.5 kg/m <sup>2</sup> )     |       | 0.58 (0.32, 1.07)          | 0.48                      | 0.57 (0.35, 0.93)        | 0.46                      | 1.0                    |                           | 0.52 (0.22, 1.22) | 0.70                      |
| Normal weight (18.5 – 24.9 kg/m <sup>2</sup> ) |       | 1.23 (0.98, 1.56)          | Ref.                      | 0.74 (0.59, 0.92)        | Ref.                      | 1.0                    |                           | 1.28 (0.95, 1.72) | Ref.                      |
| Overweight/Obese (≥ 25 kg/m <sup>2</sup> )     |       | 0.83 (0.54, 1.27)          | 0.53                      | 1.79 (0.98, 3.26)        | 0.13                      | 1.0                    |                           | 0.85 (0.63, 1.16) | 0.55                      |
| <b>Stunting at birth</b>                       | 4,741 |                            |                           |                          |                           |                        |                           |                   |                           |
| Underweight (BMI <18.5 kg/m <sup>2</sup> )     |       | 0.73 (0.42, 1.24)          | 0.13                      | 1.12 (0.82, 1.52)        | 0.70                      | 1.0                    |                           | 0.67 (0.34, 1.34) | 0.14                      |
| Normal weight (18.5 – 24.9 kg/m <sup>2</sup> ) |       | 1.14 (0.91, 1.44)          | Ref.                      | 1.09 (0.90, 1.33)        | Ref.                      | 1.0                    |                           | 1.17 (0.88, 1.55) | Ref.                      |
| Overweight/Obese (≥ 25 kg/m <sup>2</sup> )     |       | 0.69 (0.44, 1.08)          | 0.04                      | 0.88 (0.47, 1.65)        | 0.33                      | 1.0                    |                           | 0.97 (0.72, 1.30) | 0.27                      |
| <b>Microcephaly</b>                            | 5,615 |                            |                           |                          |                           |                        |                           |                   |                           |
| Underweight (BMI <18.5 kg/m <sup>2</sup> )     |       | 0.79 (0.37, 1.68)          | 0.43                      | 1.33 (0.86, 2.04)        | 0.74                      | 1.0                    |                           | 1.35 (0.56, 3.23) | 0.79                      |
| Normal weight (18.5 – 24.9 kg/m <sup>2</sup> ) |       | 1.09 (0.78, 1.51)          | Ref.                      | 1.02 (0.77, 1.35)        | Ref.                      | 1.0                    |                           | 0.98 (0.65, 1.49) | Ref.                      |
| Overweight/Obese (≥ 25 kg/m <sup>2</sup> )     |       | 0.93 (0.50, 1.75)          | 0.66                      | 0.50 (0.15, 1.61)        | 0.22                      | 1.0                    |                           | 1.06 (0.68, 1.64) | 0.86                      |
| <b>Macrosomia</b>                              | 6,579 |                            |                           |                          |                           |                        |                           |                   |                           |
| Underweight (BMI <18.5 kg/m <sup>2</sup> )     |       | 0.95 (0.11, 7.99)          | 0.82                      | 0.45 (0.11, 1.91)        | 0.62                      | 1.0                    |                           | 0.29 (0.04, 2.20) | 0.44                      |
| Normal weight (18.5 – 24.9 kg/m <sup>2</sup> ) |       | 0.35 (0.16, 0.79)          | Ref.                      | 0.59 (0.34, 1.00)        | Ref.                      | 1.0                    |                           | 2.10 (1.22, 3.62) | Ref.                      |
| Overweight/Obese (≥ 25 kg/m <sup>2</sup> )     |       | 1.66 (0.43, 6.36)          | 0.39                      | 2.29 (0.65, 8.06)        | 0.20                      | 1.0                    |                           | 0.99 (0.58, 1.67) | 0.72                      |

<sup>1</sup> Multivariable models adjusted for maternal age, education, marital status, wealth quintile, smoking status, alcohol consumption, maternal pre-pregnancy BMI, and supplementation group assignment.

<sup>2</sup> *P*-value for interaction based on Wald test evaluating the relationship between gestational weight gain adequacy ratio and perinatal outcome among normal weight women is the reference.

**Supplemental Table 3:** Associations between percent adequacy of total gestational weight gain and perinatal outcomes, modified by maternal age<sup>1</sup>.

| Characteristic                   | n     | Severely Inadequate (<70%) |                           | Inadequate (70% to <90%) |                           | Adequate (90% to 125%) |  | Excessive (>125%) |                           |
|----------------------------------|-------|----------------------------|---------------------------|--------------------------|---------------------------|------------------------|--|-------------------|---------------------------|
|                                  |       | RR (95% CI)                | <i>P int</i> <sup>2</sup> | RR (95% CI)              | <i>P int</i> <sup>2</sup> | RR (95% CI)            |  | RR (95% CI)       | <i>P int</i> <sup>2</sup> |
| <b>Stillbirth</b>                | 6,579 |                            |                           |                          |                           |                        |  |                   |                           |
| <20 years                        |       | 1.24 (0.55, 2.82)          | 0.76                      | 0.78 (0.32, 1.86)        | 0.65                      | 1.0                    |  | 1.85 (0.84, 4.04) | 0.32                      |
| 20 – 29 years                    |       | 1.03 (0.51, 2.06)          | Ref.                      | 1.38 (0.72, 2.65)        | Ref.                      | 1.0                    |  | 1.70 (0.84, 3.48) | Ref.                      |
| >30 years                        |       | 2.12 (1.09, 4.14)          | 0.61                      | 0.82 (0.40, 1.70)        | 0.12                      | 1.0                    |  | 1.23 (0.65, 2.32) | 0.46                      |
| <b>Perinatal death</b>           | 6,376 |                            |                           |                          |                           |                        |  |                   |                           |
| <20 years                        |       | 1.06 (0.59, 1.94)          | 0.65                      | 0.74 (0.37, 1.47)        | 0.71                      | 1.0                    |  | 1.57 (0.77, 3.17) | 0.22                      |
| 20 – 29 years                    |       | 0.90 (0.56, 1.45)          | Ref.                      | 0.99 (0.62, 1.58)        | Ref.                      | 1.0                    |  | 0.92 (0.54, 1.56) | Ref.                      |
| >30 years                        |       | 1.42 (0.85, 2.38)          | 0.44                      | 0.77 (0.44, 1.37)        | 0.32                      | 1.0                    |  | 1.64 (0.97, 2.77) | 0.24                      |
| <b>Preterm-born</b>              | 6,370 |                            |                           |                          |                           |                        |  |                   |                           |
| <20 years                        |       | 0.93 (0.64, 1.37)          | 0.049                     | 1.19 (0.79, 1.80)        | 0.30                      | 1.0                    |  | 1.66 (0.99, 2.81) | 0.89                      |
| 20 – 29 years                    |       | 1.25 (0.93, 1.69)          | Ref.                      | 1.01 (0.75, 1.38)        | Ref.                      | 1.0                    |  | 1.27 (0.88, 1.84) | Ref.                      |
| >30 years                        |       | 0.75 (0.54, 1.04)          | 0.9                       | 0.86 (0.62, 1.21)        | 0.6                       | 1.0                    |  | 0.71 (0.48, 1.06) | 0.74                      |
| <b>Low birthweight</b>           | 6,205 |                            |                           |                          |                           |                        |  |                   |                           |
| <20 years                        |       | 1.00 (0.62, 1.62)          | 1.0                       | 1.20 (0.69, 2.09)        | 0.66                      | 1.0                    |  | 1.18 (0.50, 2.76) | 0.77                      |
| 20 – 29 years                    |       | 1.84 (1.19, 2.85)          | Ref.                      | 1.31 (0.83, 2.09)        | Ref.                      | 1.0                    |  | 1.22 (0.66, 2.22) | Ref.                      |
| >30 years                        |       | 0.88 (0.56, 1.38)          | 0.36                      | 0.78 (0.47, 1.29)        | 0.23                      | 1.0                    |  | 1.26 (0.69, 2.30) | 0.85                      |
| <b>Small-for-gestational age</b> | 6,188 |                            |                           |                          |                           |                        |  |                   |                           |
| <20 years                        |       | 1.15 (0.85, 1.54)          | 0.15                      | 1.24 (0.89, 1.73)        | 0.09                      | 1.0                    |  | 0.87 (0.50, 1.53) | 0.83                      |
| 20 – 29 years                    |       | 1.71 (1.32, 2.21)          | Ref.                      | 1.44 (1.10, 1.87)        | Ref.                      | 1.0                    |  | 0.90 (0.64, 1.28) | Ref.                      |
| >30 years                        |       | 1.04 (0.79, 1.37)          | 0.97                      | 0.93 (0.70, 1.24)        | 0.54                      | 1.0                    |  | 0.87 (0.59, 1.29) | 0.43                      |
| <b>Large-for-gestational age</b> | 6,188 |                            |                           |                          |                           |                        |  |                   |                           |
| <20 years                        |       | 1.06 (0.66, 1.70)          | 0.30                      | 1.14 (0.67, 1.95)        | 0.45                      | 1.0                    |  | 1.61 (0.92, 2.81) | 0.80                      |
| 20 – 29 years                    |       | 0.85 (0.61, 1.19)          | Ref.                      | 0.72 (0.51, 1.02)        | Ref.                      | 1.0                    |  | 1.43 (0.99, 2.08) | Ref.                      |
| >30 years                        |       | 0.60 (0.41, 0.88)          | 0.14                      | 1.03 (0.71, 1.49)        | 0.45                      | 1.0                    |  | 0.85 (0.59, 1.23) | 0.95                      |
| <b>Stunting at birth</b>         | 4,590 |                            |                           |                          |                           |                        |  |                   |                           |
| <20 years                        |       | 1.08 (0.75, 1.56)          | 0.13                      | 0.87 (0.58, 1.28)        | 0.53                      | 1.0                    |  | 0.61 (0.35, 1.08) | 0.62                      |
| 20 – 29 years                    |       | 0.95 (0.72, 1.26)          | Ref.                      | 1.10 (0.83, 1.46)        | Ref.                      | 1.0                    |  | 0.99 (0.71, 1.38) | Ref.                      |
| >30 years                        |       | <b>1.39 (1.03, 1.89)</b>   | <b>0.01</b>               | 0.94 (0.69, 1.28)        | 0.57                      | 1.0                    |  | 0.83 (0.59, 1.18) | 0.96                      |
| <b>Microcephaly</b>              | 5,435 |                            |                           |                          |                           |                        |  |                   |                           |
| <20 years                        |       | 1.47 (0.92, 2.35)          | 0.07                      | 0.89 (0.52, 1.54)        | 0.63                      | 1.0                    |  | 1.20 (0.58, 2.51) | 0.30                      |
| 20 – 29 years                    |       | 1.04 (0.68, 1.58)          | Ref.                      | 1.19 (0.79, 1.79)        | Ref.                      | 1.0                    |  | 0.89 (0.53, 1.49) | Ref.                      |
| >30 years                        |       | 1.41 (0.91, 2.18)          | 0.29                      | 1.23 (0.81, 1.85)        | 0.55                      | 1.0                    |  | 0.92 (0.53, 1.59) | 0.72                      |
| <b>Macrosomia</b>                | 6,205 |                            |                           |                          |                           |                        |  |                   |                           |
| <20 years                        |       | 0.80 (0.16, 3.98)          | 0.46                      | 1.77 (0.52, 6.01)        | 0.91                      | 1.0                    |  | 1.74 (0.58, 5.20) | 0.92                      |
| 20 – 29 years                    |       | 0.69 (0.27, 1.77)          | Ref.                      | 0.76 (0.31, 1.87)        | Ref.                      | 1.0                    |  | 1.81 (0.79, 4.15) | Ref.                      |
| >30 years                        |       | <b>0.45 (0.13, 1.54)</b>   | <b>0.03</b>               | 1.69 (0.70, 4.08)        | 0.64                      | 1.0                    |  | 1.67 (0.85, 3.28) | 0.56                      |

<sup>1</sup>Multivariable models adjusted for maternal age, education, marital status, wealth quintile, smoking status, alcohol consumption, maternal pre-pregnancy BMI, and supplementation group assignment.

<sup>2</sup> P-value for interaction based on Wald test evaluating the relationship between gestational weight gain adequacy ratio and perinatal outcome among normal weight women is the reference.

**Supplemental Table 4:** Associations between percent adequacy of early gestational weight gain (2<sup>nd</sup> trimester) and perinatal outcomes, modified by maternal age<sup>1</sup>.

| Characteristic                   | n     | Severely Inadequate (<70%) |                           | Inadequate (70% to <90%) |                           | Adequate (90% to 125%) | Excessive (>125%) |                           |
|----------------------------------|-------|----------------------------|---------------------------|--------------------------|---------------------------|------------------------|-------------------|---------------------------|
|                                  |       | RR (95% CI)                | <i>P int</i> <sup>2</sup> | RR (95% CI)              | <i>P int</i> <sup>2</sup> | RR (95% CI)            | RR (95% CI)       | <i>P int</i> <sup>2</sup> |
| <b>Stillbirth</b>                | 7,054 |                            |                           |                          |                           |                        |                   |                           |
| <20 years                        |       | 0.69 (0.28, 1.66)          | 0.96                      | 1.88 (0.96, 3.67)        | 0.06                      | 1.0                    | 1.23 (0.58, 2.64) | 0.31                      |
| 20 – 29 years                    |       | 1.06 (0.59, 1.92)          | Ref.                      | 0.67 (0.37, 1.20)        | Ref.                      | 1.0                    | 0.97 (0.52, 1.81) | Ref.                      |
| >30 years                        |       | 0.96 (0.47, 1.95)          | 0.94                      | 1.71 (0.94, 3.10)        | 0.18                      | 1.0                    | 1.38 (0.79, 2.39) | 0.38                      |
| <b>Perinatal death</b>           | 6,750 |                            |                           |                          |                           |                        |                   |                           |
| <20 years                        |       | 1.07 (0.57, 2.01)          | 0.34                      | 1.39 (0.81, 2.39)        | 0.09                      | 1.0                    | 0.94 (0.50, 1.77) | 0.51                      |
| 20 – 29 years                    |       | 0.86 (0.54, 1.38)          | Ref.                      | 0.68 (0.44, 1.05)        | Ref.                      | 1.0                    | 0.94 (0.59, 1.50) | Ref.                      |
| >30 years                        |       | 1.25 (0.72, 2.17)          | 0.41                      | 1.36 (0.84, 2.19)        | 0.24                      | 1.0                    | 1.11 (0.73, 1.71) | 0.56                      |
| <b>Preterm-born</b>              | 6,807 |                            |                           |                          |                           |                        |                   |                           |
| <20 years                        |       | 1.02 (0.70, 1.48)          | 0.22                      | 1.23 (0.87, 1.75)        | 0.63                      | 1.0                    | 1.26 (0.81, 1.97) | 0.73                      |
| 20 – 29 years                    |       | 1.56 (1.17, 2.07)          | Ref.                      | 0.88 (0.67, 1.15)        | Ref.                      | 1.0                    | 1.07 (0.77, 1.47) | Ref.                      |
| >30 years                        |       | 0.89 (0.64, 1.22)          | 0.33                      | 0.80 (0.59, 1.08)        | 0.61                      | 1.0                    | 0.64 (0.46, 0.90) | 0.60                      |
| <b>Low birthweight</b>           | 6,579 |                            |                           |                          |                           |                        |                   |                           |
| <20 years                        |       | 1.05 (0.63, 1.75)          | 0.94                      | 1.19 (0.75, 1.89)        | 0.78                      | 1.0                    | 0.94 (0.45, 1.97) | 0.75                      |
| 20 – 29 years                    |       | 1.60 (1.06, 2.43)          | Ref.                      | 1.08 (0.73, 1.59)        | Ref.                      | 1.0                    | 0.93 (0.56, 1.55) | Ref.                      |
| >30 years                        |       | 0.95 (0.59, 1.53)          | 0.68                      | 0.98 (0.64, 1.50)        | 0.59                      | 1.0                    | 1.26 (0.77, 2.08) | 0.21                      |
| <b>Small-for-gestational age</b> | 6,559 |                            |                           |                          |                           |                        |                   |                           |
| <20 years                        |       | 1.09 (0.77, 1.56)          | 0.41                      | 1.17 (0.88, 1.56)        | 0.22                      | 1.0                    | 1.09 (0.71, 1.69) | 0.47                      |
| 20 – 29 years                    |       | 1.24 (0.94, 1.63)          | Ref.                      | 1.22 (0.96, 1.56)        | Ref.                      | 1.0                    | 0.86 (0.63, 1.16) | Ref.                      |
| >30 years                        |       | 0.92 (0.66, 1.29)          | 0.9                       | 1.10 (0.85, 1.41)        | 0.41                      | 1.0                    | 0.89 (0.64, 1.23) | 0.77                      |
| <b>Large-for-gestational age</b> | 6,559 |                            |                           |                          |                           |                        |                   |                           |
| <20 years                        |       | 0.94 (0.59, 1.49)          | 0.75                      | 1.71 (1.13, 2.58)        | 0.09                      | 1.0                    | 1.54 (0.95, 2.49) | 0.22                      |
| 20 – 29 years                    |       | 1.27 (0.92, 1.75)          | Ref.                      | 0.68 (0.50, 0.94)        | Ref.                      | 1.0                    | 1.10 (0.78, 1.55) | Ref.                      |
| >30 years                        |       | 0.75 (0.52, 1.09)          | 0.91                      | 0.84 (0.59, 1.20)        | 0.7                       | 1.0                    | 0.81 (0.58, 1.12) | 0.84                      |
| <b>Stunting at birth</b>         | 4,741 |                            |                           |                          |                           |                        |                   |                           |
| <20 years                        |       | 1.10 (0.72, 1.68)          | 0.27                      | 0.85 (0.60, 1.20)        | 0.82                      | 1.0                    | 0.63 (0.39, 1.03) | 0.46                      |
| 20 – 29 years                    |       | 0.87 (0.64, 1.19)          | Ref.                      | 0.92 (0.71, 1.20)        | Ref.                      | 1.0                    | 1.05 (0.77, 1.44) | Ref.                      |
| >30 years                        |       | 0.97 (0.67, 1.40)          | 0.52                      | 1.13 (0.86, 1.50)        | 0.12                      | 1.0                    | 0.94 (0.70, 1.26) | 0.58                      |
| <b>Microcephaly</b>              | 5,615 |                            |                           |                          |                           |                        |                   |                           |
| <20 years                        |       | 1.15 (0.66, 2.03)          | 0.17                      | 1.24 (0.77, 1.99)        | 0.09                      | 1.0                    | 1.22 (0.65, 2.32) | 0.16                      |
| 20 – 29 years                    |       | 0.99 (0.64, 1.53)          | Ref.                      | 0.87 (0.59, 1.29)        | Ref.                      | 1.0                    | 0.85 (0.53, 1.34) | Ref.                      |
| >30 years                        |       | 0.90 (0.52, 1.56)          | 0.53                      | 1.24 (0.82, 1.86)        | 0.7                       | 1.0                    | 1.33 (0.84, 2.10) | 0.54                      |
| <b>Macrosomia</b>                | 6,579 |                            |                           |                          |                           |                        |                   |                           |
| <20 years                        |       | 1.06 (0.20, 5.52)          | 0.73                      | 1.55 (0.52, 4.69)        | 0.37                      | 1.0                    | 2.19 (0.87, 5.51) | 0.17                      |
| 20 – 29 years                    |       | 0.63 (0.22, 1.80)          | Ref.                      | 0.77 (0.33, 1.78)        | Ref.                      | 1.0                    | 1.58 (0.70, 3.58) | Ref.                      |
| >30 years                        |       | 0.73 (0.19, 2.82)          | 0.22                      | 1.07 (0.44, 2.58)        | 0.33                      | 1.0                    | 2.18 (1.20, 3.99) | 0.71                      |

<sup>1</sup>Multivariable models adjusted for maternal age, education, marital status, wealth quintile, smoking status, alcohol consumption, maternal pre-pregnancy BMI, and supplementation group assignment.

<sup>2</sup>P-value for interaction based on Wald test evaluating the relationship between gestational weight gain adequacy ratio and perinatal outcome among normal weight women is the reference.

**Supplementary Table 5:** Associations between gestational weight gain (GWG) z-scores, using Intergrowth-21st standards, and perinatal outcomes, among normal weight women<sup>1</sup>.

| Characteristic                              | Total n | No. of cases (%) | GWGz <-2 SD RR (95% CI) | GWGz -2 SD to <-1 SD RR (95% CI) | GWGz -1 SD to <1 SD Reference | GWGz ≥1 SD RR (95% CI) |
|---------------------------------------------|---------|------------------|-------------------------|----------------------------------|-------------------------------|------------------------|
| <b>Total GWG</b>                            |         |                  |                         |                                  |                               |                        |
| Stillbirth                                  | 4314    | 123 (2.85)       | 1.27 (0.65, 2.48)       | 0.98 (0.63, 1.54)                | 1.0                           | 2.51 (1.26, 4.99)      |
| Perinatal death                             | 4165    | 195 (4.68)       | 1.06 (0.60, 1.87)       | 0.94 (0.66, 1.35)                | 1.0                           | 1.45 (0.73, 2.85)      |
| Preterm-born                                | 4191    | 630 (15.0)       | 0.82 (0.57, 1.18)       | 0.80 (0.65, 0.98)                | 1.0                           | 1.48 (0.97, 2.25)      |
| Low birthweight                             | 4076    | 243 (5.96)       | 1.62 (1.02, 2.55)       | 0.93 (0.68, 1.29)                | 1.0                           | 1.43 (0.73, 2.77)      |
| Small-for-gestational age                   | 4066    | 866 (21)         | 1.72 (1.31, 2.27)       | 1.54 (1.30, 1.83)                | 1.0                           | 0.73 (0.45, 1.18)      |
| Large-for-gestational age                   | 4066    | 512 (12.6)       | 0.51 (0.33, 0.81)       | 0.62 (0.49, 0.79)                | 1.0                           | 1.52 (0.97, 2.37)      |
| Stunting at birth                           | 2996    | 797 (27)         | 1.16 (0.84, 1.59)       | 1.16 (0.96, 1.41)                | 1.0                           | 0.64 (0.39, 1.08)      |
| Microcephaly                                | 3564    | 307 (8.62)       | 1.46 (0.96, 2.22)       | 1.39 (1.06, 1.82)                | 1.0                           | 0.61 (0.26, 1.41)      |
| Macrosomia                                  | 4076    | 83 (2.04)        | 0.16 (0.02, 1.13)       | 0.37 (0.18, 0.74)                | 1.0                           | 1.62 (0.66, 4.01)      |
| <b>Early GWG (2<sup>nd</sup> trimester)</b> |         |                  |                         |                                  |                               |                        |
| Stillbirth                                  | 4630    | 145 (3.13)       | 1.89 (0.95, 3.76)       | 0.87 (0.45, 1.67)                | 1.0                           | 1.08 (0.60, 1.95)      |
| Perinatal death                             | 4411    | 231 (5.24)       | 1.26 (0.65, 2.42)       | 0.94 (0.56, 1.57)                | 1.0                           | 1.22 (0.77, 1.92)      |
| Preterm-born                                | 4485    | 753 (16.8)       | 1.51 (1.01, 2.24)       | 1.58 (1.22, 2.06)                | 1.0                           | 1.19 (0.90, 1.58)      |
| Low birthweight                             | 4325    | 286 (6.61)       | 1.36 (0.75, 2.46)       | 1.30 (0.85, 1.97)                | 1.0                           | 1.39 (0.92, 2.10)      |
| Small-for-gestational age                   | 4313    | 910 (21)         | 1.05 (0.70, 1.56)       | 1.10 (0.85, 1.43)                | 1.0                           | 0.63 (0.47, 0.86)      |
| Large-for-gestational age                   | 4313    | 586 (13.6)       | 1.30 (0.83, 2.05)       | 1.28 (0.94, 1.73)                | 1.0                           | 1.51 (1.13, 2.01)      |
| Stunting at birth                           | 3094    | 814 (26)         | 1.09 (0.72, 1.67)       | 1.23 (0.92, 1.66)                | 1.0                           | 1.23 (0.93, 1.62)      |
| Microcephaly                                | 3679    | 312 (8.48)       | 1.68 (1.01, 2.81)       | 0.95 (0.61, 1.50)                | 1.0                           | 0.89 (0.57, 1.38)      |
| Macrosomia                                  | 4325    | 86 (1.99)        | 0.82 (0.20, 3.32)       | 0.46 (0.14, 1.47)                | 1.0                           | 2.82 (1.65, 4.80)      |

<sup>1</sup> Multivariable models adjusted for maternal age, education, marital status, wealth quintile, smoking status, alcohol consumption, maternal pre-pregnancy body-mass-index, parity, and supplementation group assignment.
